# Supplementary material for: Network Diffusion Approach to Predict LncRNA Disease Associations Using Multi-Type Biological Networks: LION
Source: PubMed Central journal article supplement (PMC6646690; doi:10.3389/fphys.2019.00888), 2019-07-16
Supplement: Data_Sheet_1.pdf [file Data_Sheet_1.pdf]

**LION**( $D, PPI, LPI$ )

**input:**

$D$ : set of known disease proteins

$PPI$ : protein-protein interaction network

$LPI$ : lncRNA-protein interaction network

**output:**

$L$ : the set of ranked candidate lncRNAs

$PPI\_sub \leftarrow$  subgraph of  $PPI$ , all edges involving a protein in  $D$

$LPI\_sub \leftarrow$  subgraph of  $LPI$ , all edges involving a protein in  $N$

$S \leftarrow$  disease subnetwork, the union of  $PPI\_sub$  and  $LPI\_sub$

$N \leftarrow$  number of nodes of  $S$

$p^0 \leftarrow$  vector with size  $N$ , initialized to all zeros

// probability vector for step 0

**for each** protein  $i$  **in**  $D$  **do**

$p_i^0 \leftarrow 1 / (\text{number of elements in } D)$

**end for**

$p^k \leftarrow p^0$

// probability vector for step  $k$

$r \leftarrow 0.5$

// restart probability

$W \leftarrow$  adjacency matrix of  $S$ , column normalized

$p^{k+1} \leftarrow (1 - r) * (W \cdot p^k) + r * p^0$

// probability vector for step  $k+1$

**while**  $\|p^{k+1} - p^k\|_{L1} > 10^{-6}$  **do**

// main iteration

$p^k \leftarrow p^{k+1}$

$p^{k+1} \leftarrow (1 - r) * (W \cdot p^k) + r * p^0$

**end while**

$L \leftarrow$  subset of  $p^{k+1}$  representing all lncRNA nodes in  $S$

**return**  $L$
